# Supplementary material for: Novel Compound Heterozygous Variants in MKS1 Leading to Joubert Syndrome
Source: Front Genet. 2020 Oct 14;11:576235. doi: 10.3389/fgene.2020.576235 (PMC7592398; doi:10.3389/fgene.2020.576235)
Supplement: Supplementary file 1 [file Table_1.xlsx]

## Sheet: Sheet1
Sup Table1. Rare damaging variants in known JBTS genes
Gene	mutation	Zygosity	cDNA	genomics	Existing variation	SIFT	PolyPhen	maximal MAF
NPHP1	p.E677Q	Heterozygous	NM_000272.3:c.2029G>C	chr2:g.110881541C>G	rs780427871	0.01	0.988	0.001631
CSPP1	intronic variant	Heterozygous	NM_024790.6:c.511-4A>G	chr8:g.68007524A>G	rs142440392	NA	NA	0.001
RPGRIP1L	p.L473del	Heterozygous	NM_015272.2:c.1419_1421del	chr16:g.53691529_53691531del	rs772476883	NA	NA	0.001804
MKS1	p.G353Efs*2	Heterozygous	NM_001321269.1:c.1058delG	chr17:g.56285912delC		NA	NA	0
MKS1	splice acceptor variant	Heterozygous	NM_001321269.1:c.191-1G>A	chr17:g.56294098C>T	rs201362733	NA	NA	0.0005141
